# Supplementary material for: Facile synthesis of metal–organic framework-derived SiW12@Co3O4and its peroxidase-like activity in colorimetric assay
Source: Royal Society of Chemistry journal article supplement (doi:10.1039/c9an01262a), 2019-01-01
Supplement: c9an01262a1.pdf [file c9an01262a1.pdf]

## Electronic Supplementary Information

### Facile Synthesis of Metal-Organic Framework-Derived

### SiW<sub>12</sub>@Co<sub>3</sub>O<sub>4</sub> and its Peroxidase-Like Activity in

### Colorimetric Assay

Wei Shi<sup>a</sup>, Shuang E<sup>a</sup>, Meng-Meng Wang<sup>a</sup>, Tian-Ze Li<sup>a</sup>, Ting Yang<sup>a</sup>, Shao-Rong Liu<sup>\*b</sup>,

Ming-Li Chen<sup>\*a</sup>, Jian-Hua Wang<sup>\*a</sup>

*<sup>a</sup> Research Center for Analytical Sciences, Department of Chemistry, College of Sciences, Northeastern University, Box332, Shenyang 110819, China.*

*\*E-mail address: chenml@mail.neu.edu.cn (M.-L. Chen),*

*jianhuajrz@mail.neu.edu.cn (J.-H. Wang); Tel: +86 24 83688944; Fax: +86 24*

*83676698.*

*<sup>b</sup> Department of Chemistry and Biochemistry, University of Oklahoma, Norman, OK*

*73019, USA.*

*\*E-mail address: Shaorong.liu@ou.edu (S.-R. Liu); Tel: +1 (405) 325 9013; Fax: +1 (405) 325 6111.*

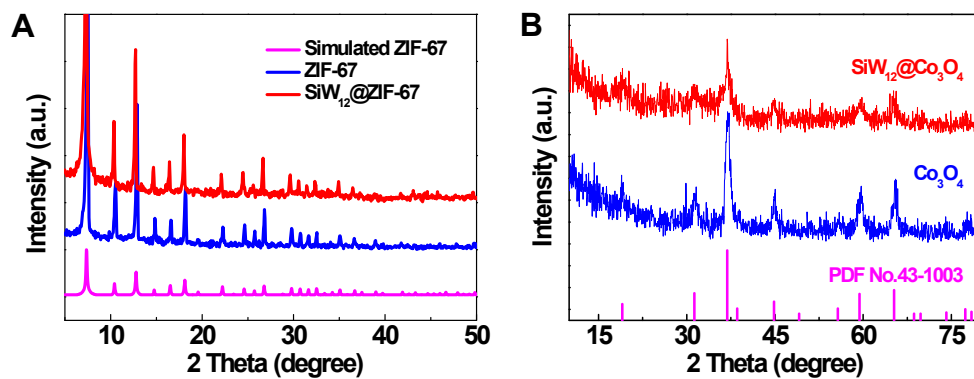

**Fig. S1** XRD curves of (A) ZIF-67 and SiW<sub>12</sub>@ZIF-67, (B) Co<sub>3</sub>O<sub>4</sub> and SiW<sub>12</sub>@Co<sub>3</sub>O<sub>4</sub>.

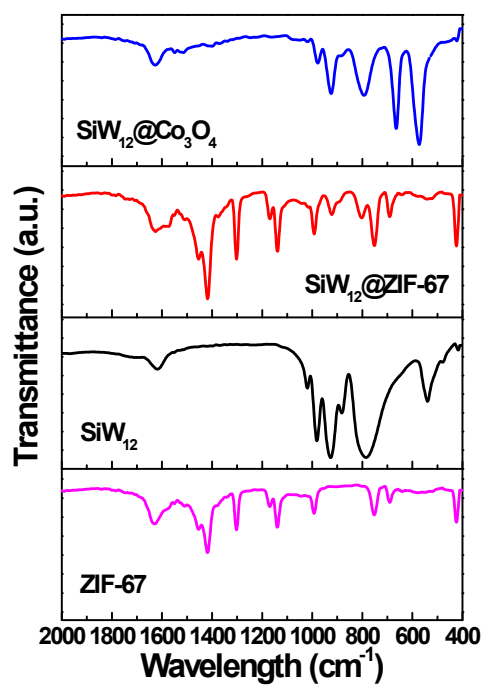

**Fig. S2** IR spectra of ZIF-67, SiW<sub>12</sub>, SiW<sub>12</sub>@ZIF-67 and SiW<sub>12</sub>@Co<sub>3</sub>O<sub>4</sub>.

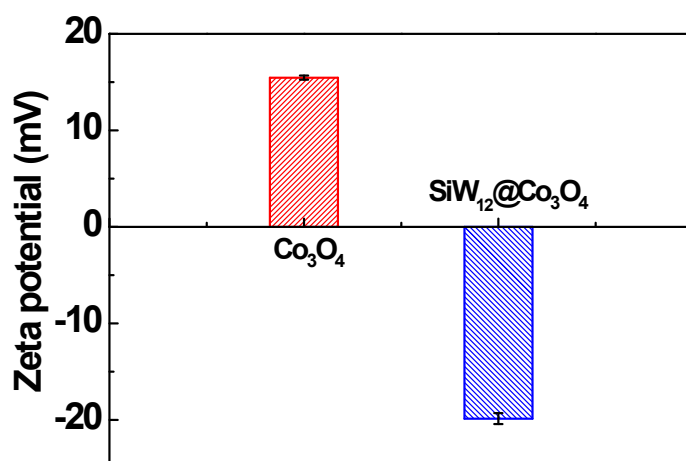

Fig. S3 Zeta potential of  $\text{Co}_3\text{O}_4$  and  $\text{SiW}_{12}@Co_3O_4$ .

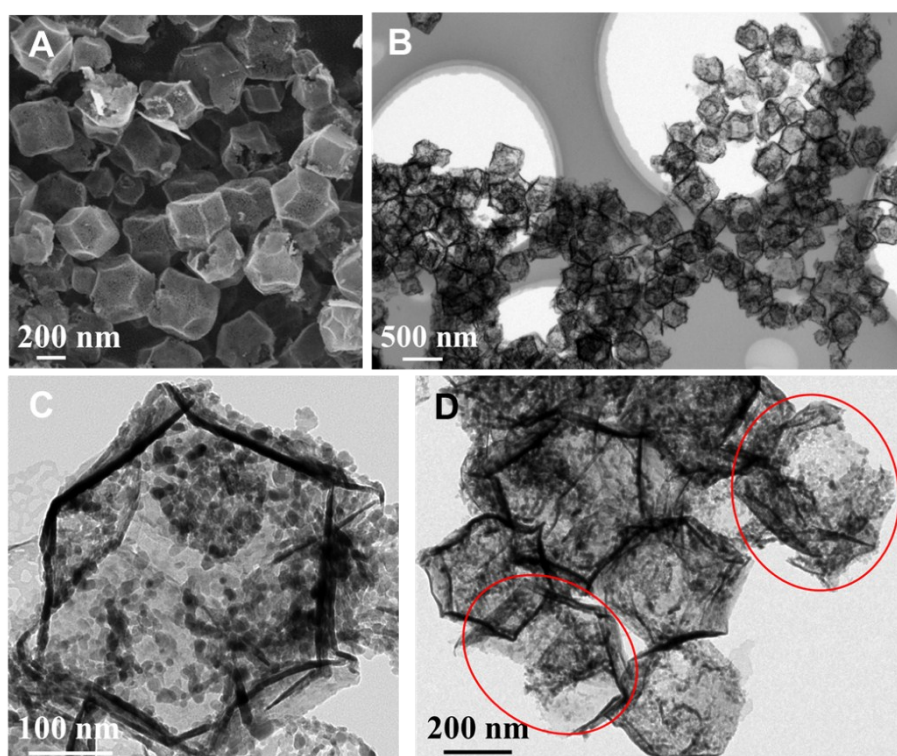

Fig. S4 (A) SEM images of  $\text{Co}_3\text{O}_4$ . (B), (C) and (D) TEM images of  $\text{Co}_3\text{O}_4$ .

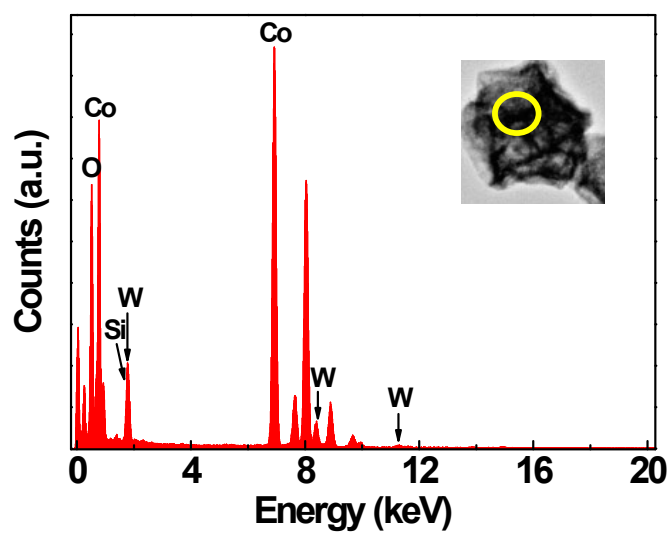

Fig. S5 EDS spectrum of SiW<sub>12</sub>@Co<sub>3</sub>O<sub>4</sub>.

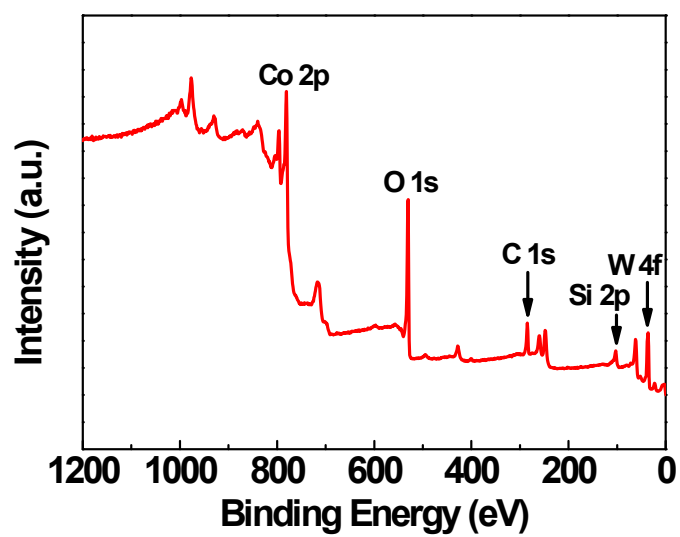

Fig. S6 XPS full survey spectrum of SiW<sub>12</sub>@Co<sub>3</sub>O<sub>4</sub>.

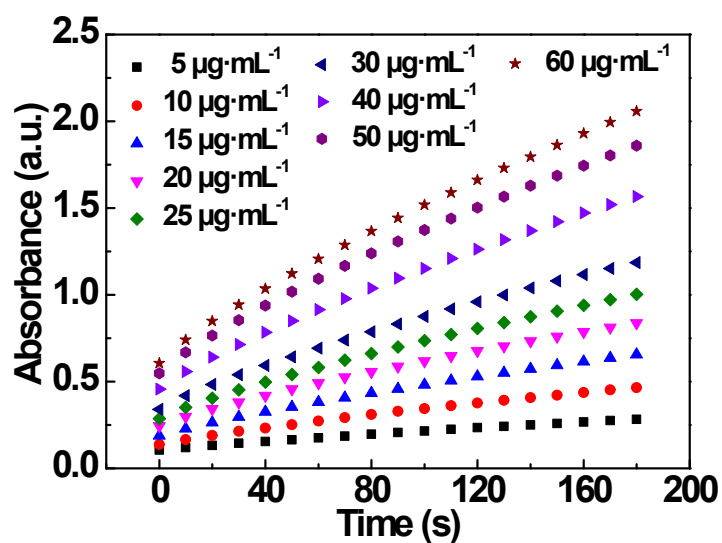

Fig. S7 Absorbance at 652 nm changing with time with different SiW<sub>12</sub>@Co<sub>3</sub>O<sub>4</sub> dosages.

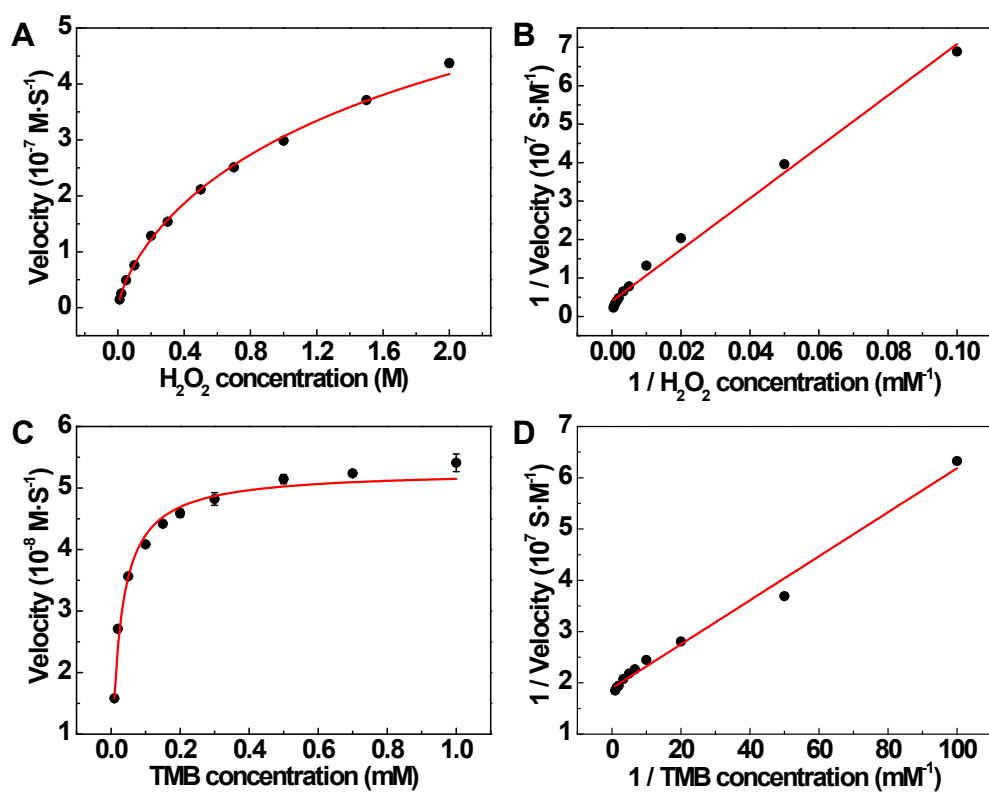

Fig. S8 Steady-state kinetic of SiW<sub>12</sub>@Co<sub>3</sub>O<sub>4</sub>.

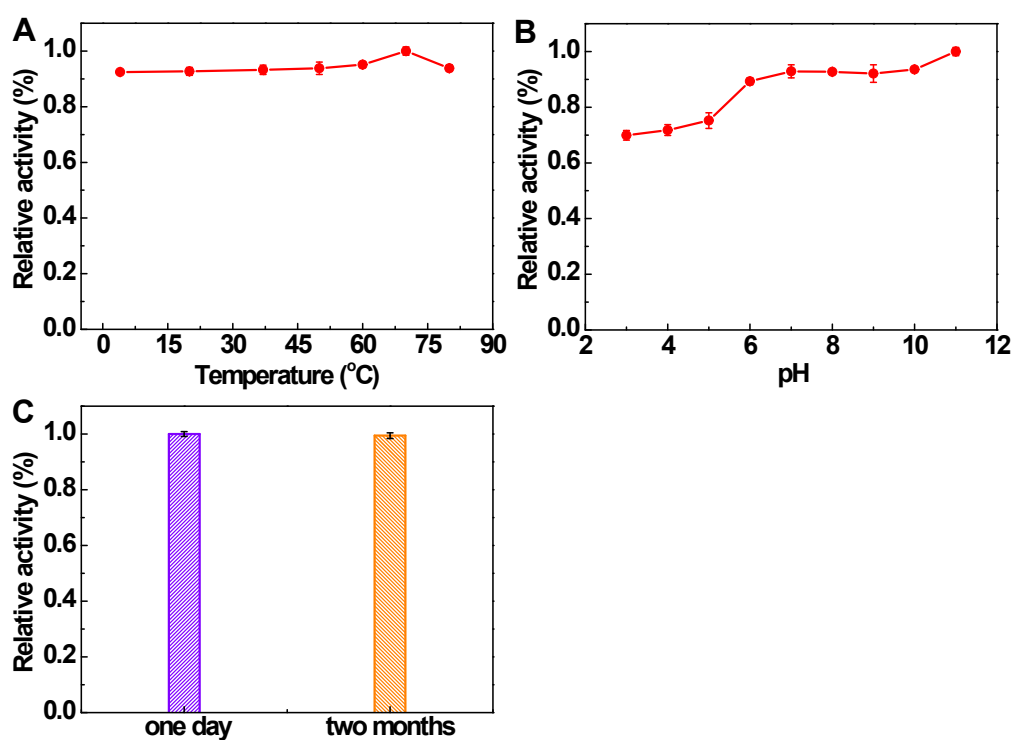

**Fig. S9** Relative peroxidase-mimicking activity of SiW<sub>12</sub>@Co<sub>3</sub>O<sub>4</sub> after incubation for 2 h at various (A) temperatures and (B) pH. (C) Relative activity of SiW<sub>12</sub>@Co<sub>3</sub>O<sub>4</sub> after being stored in water for different times.

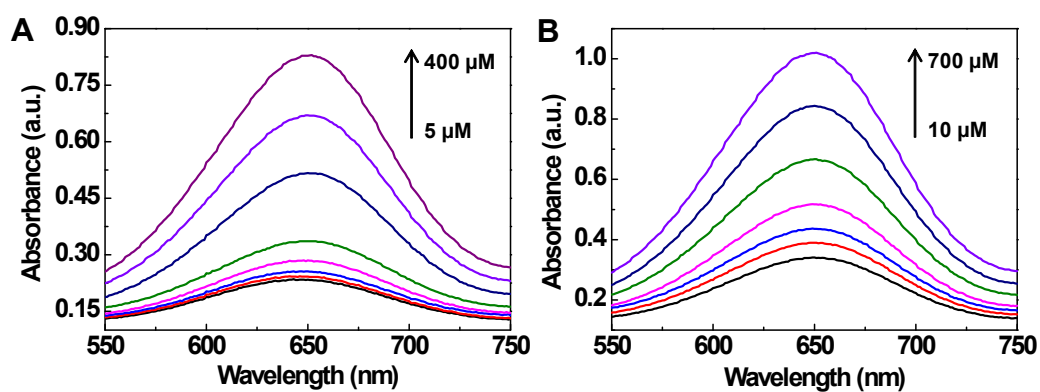

**Fig. S10** The absorption spectra of oxidation product of TMB in various (A) H<sub>2</sub>O<sub>2</sub> concentrations (5, 10, 20, 50, 100, 200, 300, and 400 μM) and (B) glucose concentrations (10, 50, 100, 200, 300, 500, and 700 μM).

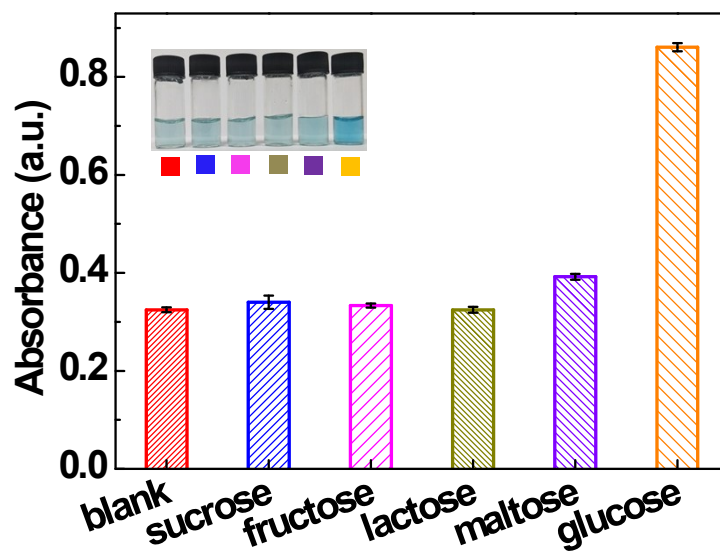

**Fig. S11** Selectivity of colorimetric methods for glucose. Inset image: photographs of corresponding solutions.

**Table S1** Kinetic parameters of  $\text{SiW}_{12}@\text{Co}_3\text{O}_4$  and HRP.

| Catalysts                                | $K_m$ [mM]             |       | $V_{\max}$ [ $10^{-8}\text{M s}^{-1}$ ] |       | Reference    |
|------------------------------------------|------------------------|-------|-----------------------------------------|-------|--------------|
|                                          | $\text{H}_2\text{O}_2$ | TMB   | $\text{H}_2\text{O}_2$                  | TMB   |              |
| HRP                                      | 3.7                    | 0.434 | 8.71                                    | 10.00 | <sup>1</sup> |
| $\text{SiW}_{12}@ \text{Co}_3\text{O}_4$ | 167.8                  | 0.023 | 25.1                                    | 5.3   | This work    |

**Table S2** Performance comparison between the proposed sensing method and other H<sub>2</sub>O<sub>2</sub> and glucose colorimetric sensors.

| Catalysts                                         | H <sub>2</sub> O <sub>2</sub> detection (μM) |                 | Glucose detection (μM) |                 | Reference |
|---------------------------------------------------|----------------------------------------------|-----------------|------------------------|-----------------|-----------|
|                                                   | Linear range                                 | Detection limit | Linear range           | Detection limit |           |
| Co <sub>3</sub> O <sub>4</sub> -MMT NPS           | 10-100                                       | 8.7             | —                      | —               | 2         |
| Cu NCs                                            | 10-1000                                      | 10              | 100-2000               | 100             | 3         |
| Au@Pt NRs                                         | 45-1000                                      | 45              | 45-400                 | 45              | 4         |
| N-GODs                                            | 20-1170                                      | 5.3             | 25-375                 | 16              | 5         |
| H <sub>2</sub> TCPP-NiO                           | 20-100                                       | 8.0             | 50-500                 | 20              | 6         |
| CeO <sub>2</sub> /NT-TiO <sub>2</sub> @0.1        | 5-100                                        | 3.2             | 10-500                 | 6.1             | 7         |
| NiFe-LDHNS                                        | 10-500                                       | 4.4             | 50-2000                | 23              | 8         |
| GO-FeTPyP                                         | 20-500                                       | 72              | —                      | —               | 9         |
| CuO-Au                                            | —                                            | —               | 0-30                   | 6.75            | 10        |
| SiW <sub>12</sub> @Co <sub>3</sub> O <sub>4</sub> | 5-400                                        | 1.0             | 10-700                 | 3.3             | This work |

**Table S3** Determination of glucose in orange juice and human urine.

| Samples      | Spiked (mM) | Found (mM) | Recovery (%) | RSD (%; n=3) |
|--------------|-------------|------------|--------------|--------------|
| Orange juice | 0           | 0.209      | —            | 2.8          |
|              | 0.1         | 0.312      | 103          | 0.8          |
|              | 0.2         | 0.412      | 102          | 1.6          |
|              | 0.3         | 0.515      | 102          | 1.7          |
| Urine        | 0           | 0          | —            | —            |
|              | 0.1         | 0.104      | 104          | 2.4          |
|              | 0.2         | 0.203      | 102          | 1.6          |
|              | 0.3         | 0.321      | 107          | 2.4          |

## References



1. L. Gao, J. Zhuang, L. Nie, J. Zhang, Y. Zhang, N. Gu, T. Wang, J. Feng, D. Yang, S. Perrett and X. Yan, *Nat. Nanotechnol.*, 2007, **2**, 577-583.
2. X. Zhu, W. Chen, K. Wu, H. Li, M. Fu, Q. Liu and X. Zhang, *New J. Chem.*, 2018, **42**, 1501-1509.
3. L. Hu, Y. Yuan, L. Zhang, J. Zhao, S. Majeed and G. Xu, *Anal. Chim. Acta*, 2013, **762**, 83-86.
4. J. Liu, X. Hu, S. Hou, T. Wen, W. Liu, X. Zhu, J.-J. Yin and X. Wu, *Sens. Actuators, B*, 2012, **166-167**, 708-714.
5. L. Lin, X. Song, Y. Chen, M. Rong, T. Zhao, Y. Wang, Y. Jiang and X. Chen, *Anal. Chim. Acta*, 2015, **869**, 89-95.
6. Q. Liu, Y. Yang, H. Li, R. Zhu, Q. Shao, S. Yang and J. Xu, *Biosens. Bioelectron.*, 2015, **64**, 147-153.
7. H. Zhao, Y. Dong, P. Jiang, G. Wang and J. Zhang, *ACS Appl. Mater. Interfaces*, 2015, **7**, 6451-6461.
8. C. Xiao, L. Zhang, K. Wang, H. Wang, Y. Zhou and W. Wang, *Appl. Catal., B*, 2018, **239**, 260-267.
9. C. Socaci, F. Pogacean, A. R. Biris, M. Coros, M. C. Rosu, L. Magerusan, G. Katona and S. Pruneanu, *Talanta*, 2016, **148**, 511-517.
10. S. Mvango and P. Mashazi, *Materials Science Engineering. C, Mater. Sci. Eng., C*, 2019, **96**, 814-823.
